# Supplementary material
Source: PubMed Central journal article supplement (PMC8665054)

# Source Data Figure 4

**a**

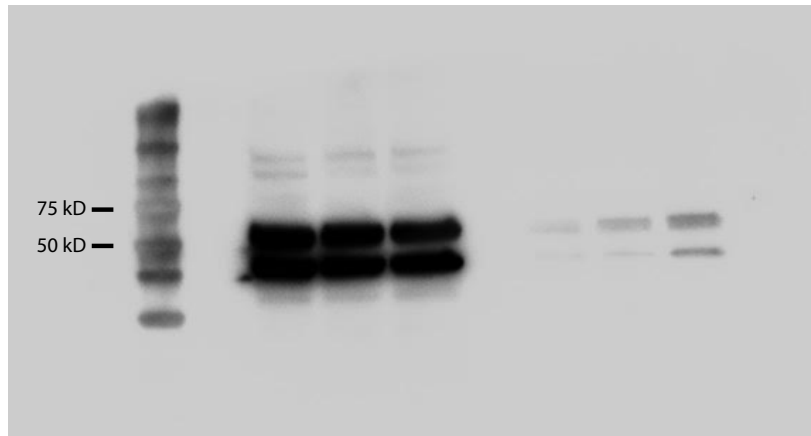

**b**

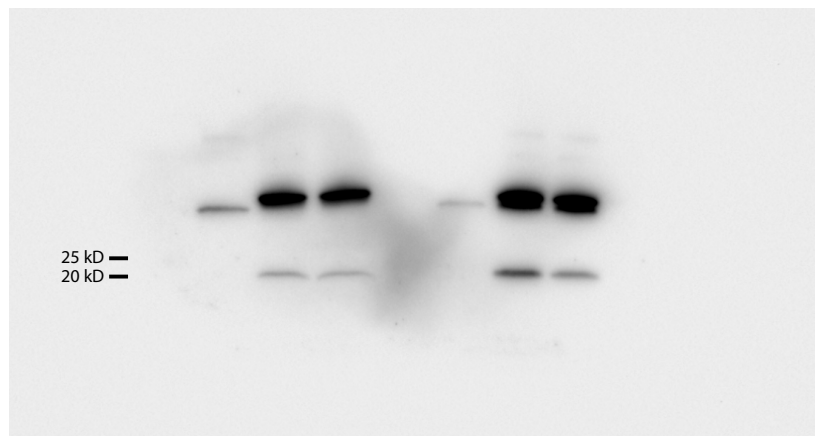

Supplement: NIHMS1746371-supplement-Source_Data_Figure_4.pdf [file NIHMS1746371-supplement-Source_Data_Figure_4.pdf]
